# Supplementary material
Source: PubMed Central journal article supplement (PMC3043152)
Supplement: NIHMS266112-supplement-1_si_001.pdf [file NIHMS266112-supplement-1_si_001.pdf]

## Supporting Information.

### Title:

Structure of *trans*-resveratrol in complex with the cardiac regulatory protein troponin C.

### Authors:

Sandra E. Pineda-Sanabria, Ian M. Robertson, and Brian D. Sykes\*

### Table of Contents:

|                                                                                                |    |
|------------------------------------------------------------------------------------------------|----|
| Figure 1: Oxidation rate determined by following the chemical shift change of H2/H6 over time. | S2 |
| Figure 2: ROEs measured at each mixing time.                                                   | S3 |
| Figure 3: Binding of resveratrol to cTnC.                                                      | S4 |
| Figure 4: Ligand dependant chemical shift perturbations of cTnC.                               | S5 |
| Figure 5: Intramolecular NOEs of resveratrol in complex with cTnC.                             | S6 |
| Table 1: Structural statistics for 20 NMR structures of cTnC•resveratrol.                      | S7 |

**Figure 1: Oxidation rate determined by following the chemical shift change of H2/H6 over time.** The initial starting chemical shift was normalized to one, and the chemical shift was measured at each time point. Since the H2/H6 is a doublet, the chemical shift from the further downfield peak of the doublet was measured.

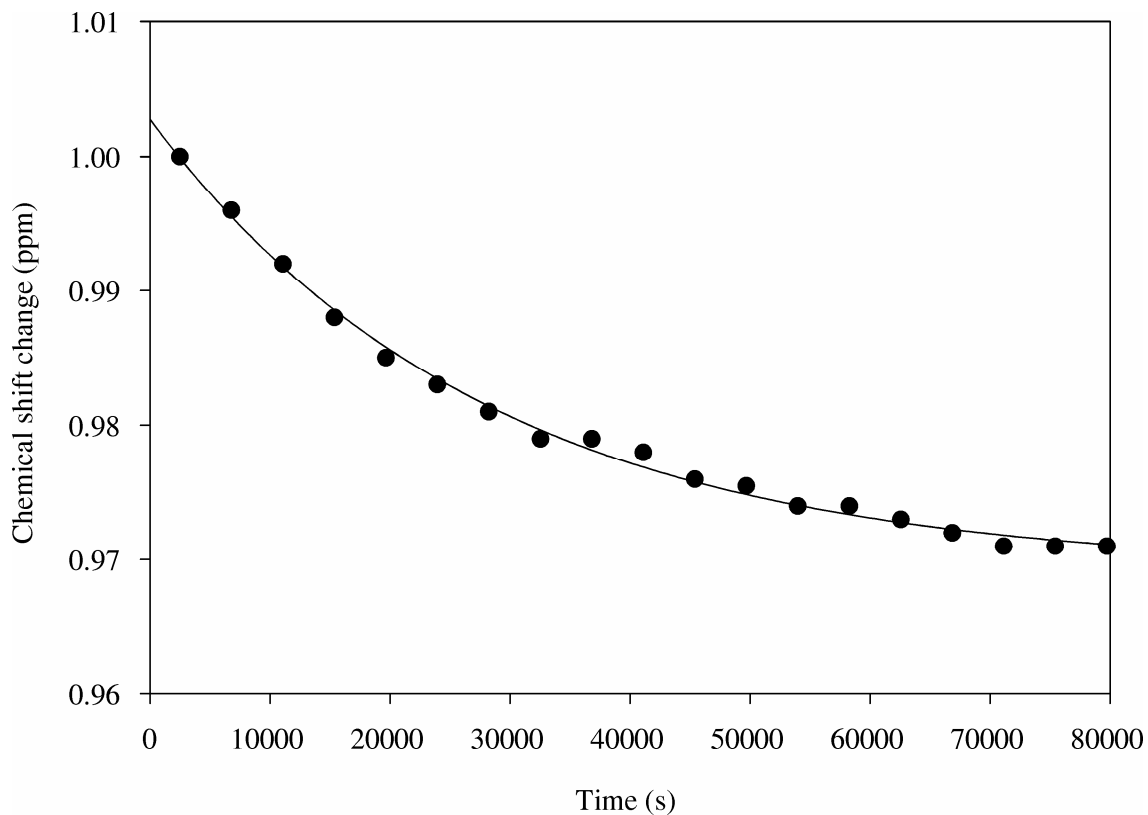

Figure 2: ROEs measured at each mixing time.

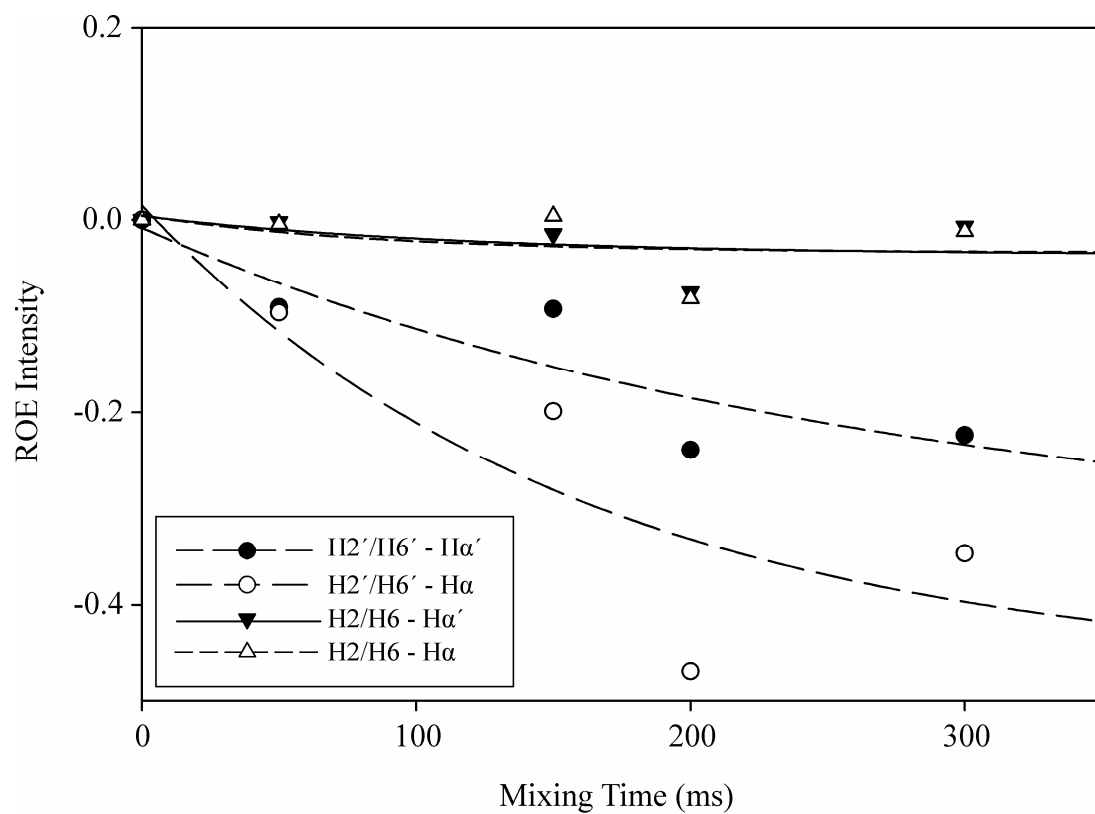

**Figure 3: Binding of resveratrol to cTnC.** **a.**  $^1\text{H}, ^{15}\text{N}$ -HSQC spectra of cTnC acquired throughout the titration with resveratrol. The first point in the titration is represented with 20 contours; whereas, each titration point with resveratrol is represented by a single contour (O). Direction of CSPs are indicated by arrows for several peaks. **b.** fitting of  $^1\text{H}, ^{15}\text{N}$ -HSQC with xcrvfit to determine the dissociation constant. **c.** Bar graph of the total chemical shift change ( $\Delta\delta = \sqrt{(\Delta\delta_H)^2 + \frac{1}{25}(\Delta\delta_N)^2}$ ) versus residue number for the titration of resveratrol into cTnC (light grey) and cCTnC (dark grey).

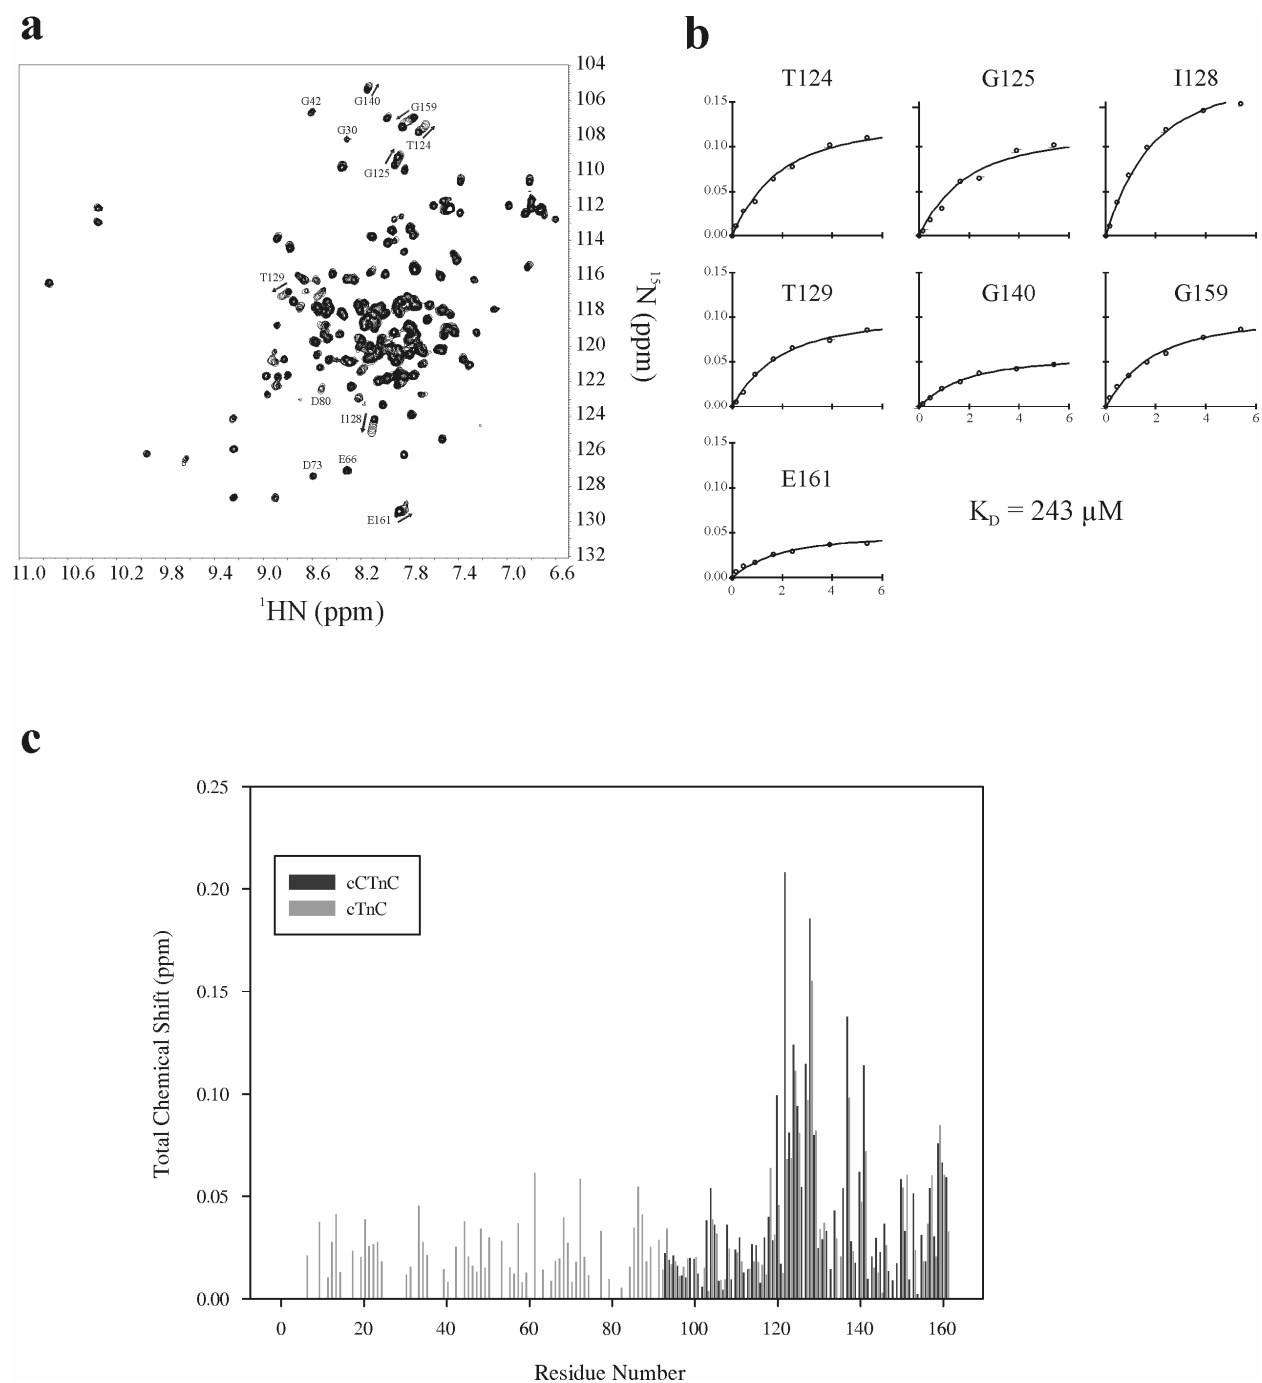

**Figure 4: Ligand dependant chemical shift perturbations of cCTnC.** Bar graph of the total chemical shift change ( $\Delta\delta = \sqrt{(\Delta\delta_H)^2 + \frac{1}{25}(\Delta\delta_N)^2}$ ) versus residue number for the titration of cTnI<sub>34-71</sub> (red), EGCg (orange), EMD 57033 (yellow), and resveratrol (green) into cCTnC. Chart on the right is an expansion of the bar chart; cTnI<sub>34-71</sub> CSPs have been removed for clarity.

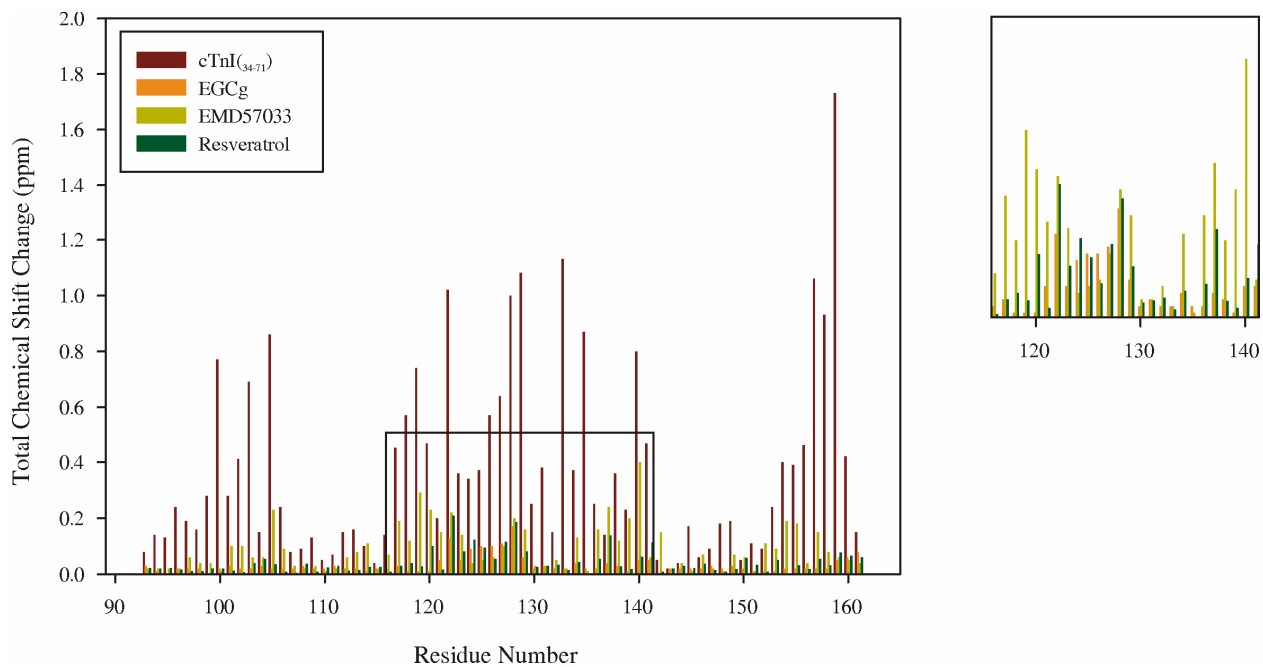

**Figure 5: Intramolecular NOEs of resveratrol in complex with cTnC.**

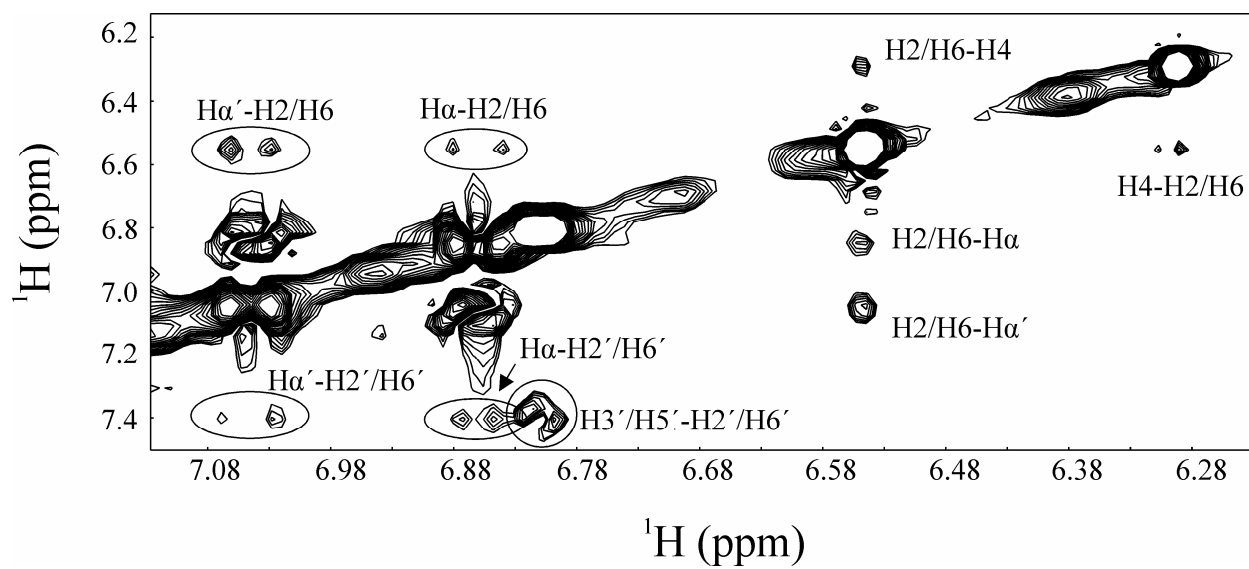

**Table 1: Structural statistics for 20 NMR structures of cCTnC•resveratrol.**

|                                                             | Backbone atoms | Heavy Atoms |
|-------------------------------------------------------------|----------------|-------------|
| <b>R.m.s.d. from the average structure</b>                  |                |             |
| All residues (Å)                                            | 0.93 ± 0.14    | 1.42 ± 0.13 |
| Ordered residues <sup>a</sup> (Å)                           | 0.72 ± 0.11    | 1.21 ± 0.13 |
| <b>Total Distance Restraints</b>                            | 925            |             |
| <b>Short range (<math> i-j =1</math>) NOEs</b>              | 519            |             |
| <b>Medium range (<math>1 &lt;  i-j  &lt; 5</math>) NOEs</b> | 201            |             |
| <b>Long range (<math> i-j  \geq 5</math>) NOEs</b>          | 179            |             |
| <b>Intermolecular NOEs</b>                                  | 23             |             |
| <b>Intramolecular NOEs</b>                                  | 4              |             |
| <b>Ca<sup>2+</sup> distance restraints</b>                  | 12             |             |
| <b>Dihedral restraints (<math>\phi/\psi</math>)</b>         | 106            |             |
| <b>NOE violations per structure</b>                         |                |             |
| > 0.5 Å                                                     | 0              |             |
| > 0.3 Å                                                     | 0              |             |
| > 0.1 Å                                                     | 2.15           |             |
| <b>Dihedral Violations &gt; 5°</b>                          | 0              |             |
| <b>Ramachadran plot statistics<sup>b</sup></b>              |                |             |
| $\phi/\psi$ in most favored regions (%)                     | 83.2 %         |             |
| $\phi/\psi$ in additionally allowed regions (%)             | 15.3 %         |             |
| $\phi/\psi$ generously allowed regions (%)                  | 1.4 %          |             |
| $\phi/\psi$ in disallowed regions (%)                       | 0.1 %          |             |

<sup>a</sup> Residues 92-105, 111-124, and 131-158

<sup>b</sup> For all residues as determined by PROCHECK
